# Supplementary material for: Tracing glacial refugia of Triturus newts based on mitochondrial DNA phylogeography and species distribution modeling
Source: PubMed Central journal article supplement (PMC3608019; doi:10.1186/1742-9994-10-13), 2013-03-20

**Additional file 5. Full genetic similarity maps.** The genetic (dis)similarity among populations within the different *Triturus* species, not cut according to the current species ranges. For each species, the genetic divergence among populations ( $Z_i$ ) was determined and subsequently interpolated across its distribution range. We use both a single scale for all *Triturus* species (allowing direct comparison among species) and aspecies specific scale (better expressing genetic structure in genetically relatively poor species). Warmer colors refer to a higher genetic divergence.

**Single scale *T. carnifex***

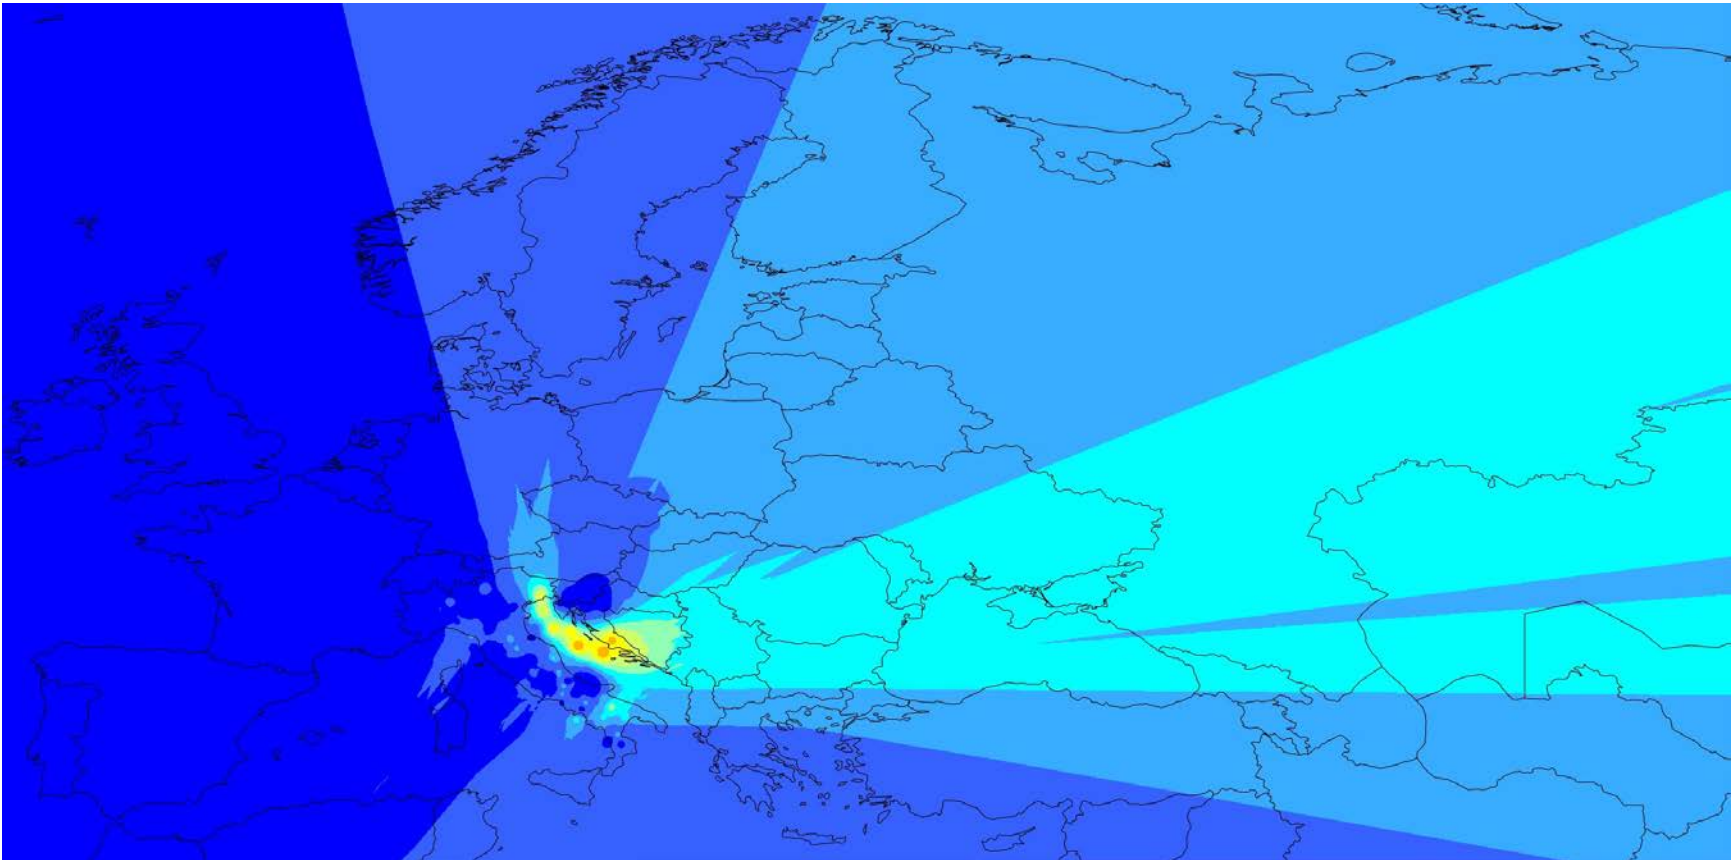

Single scale *T. cristatus*

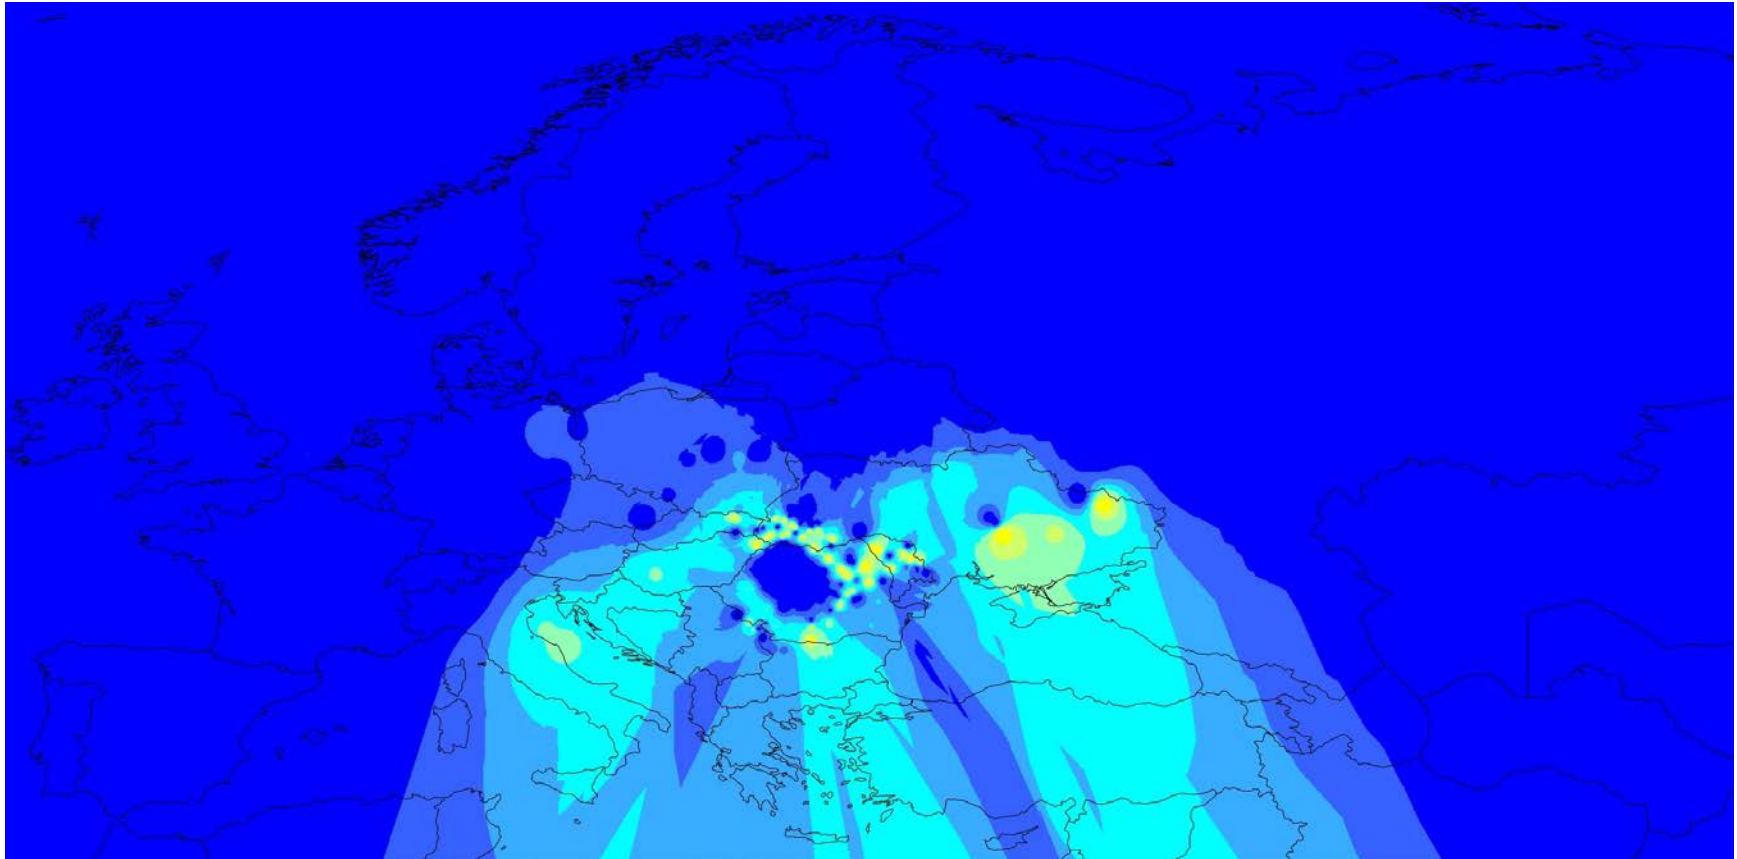

Single scale *T. dobrogicus*

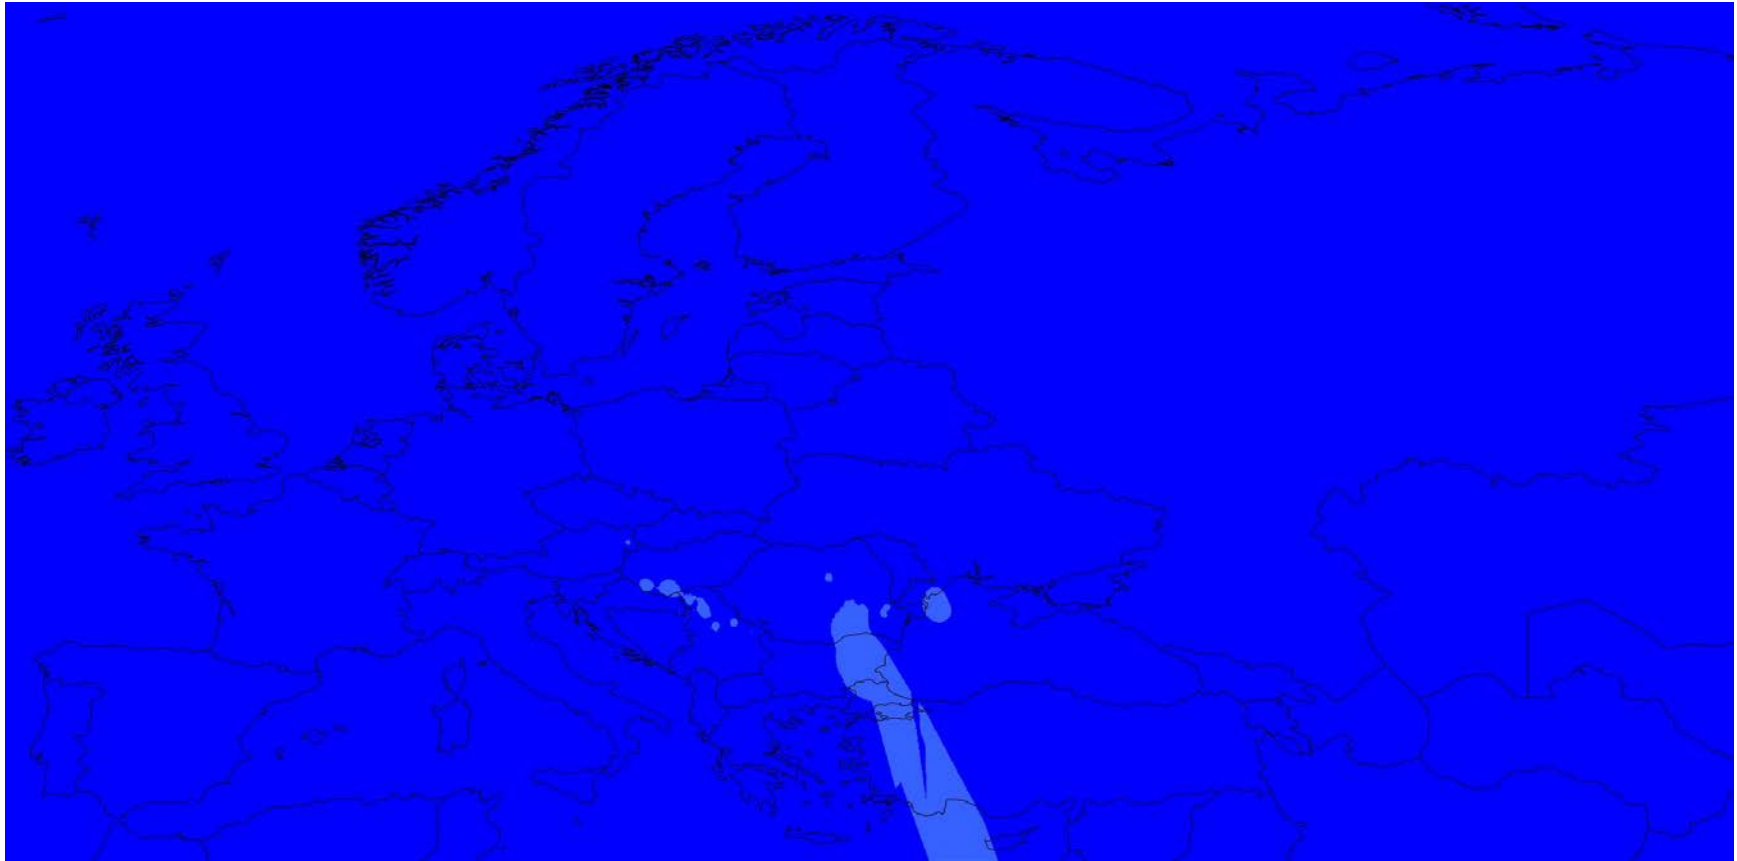

Single scale *T. karelinii* western species

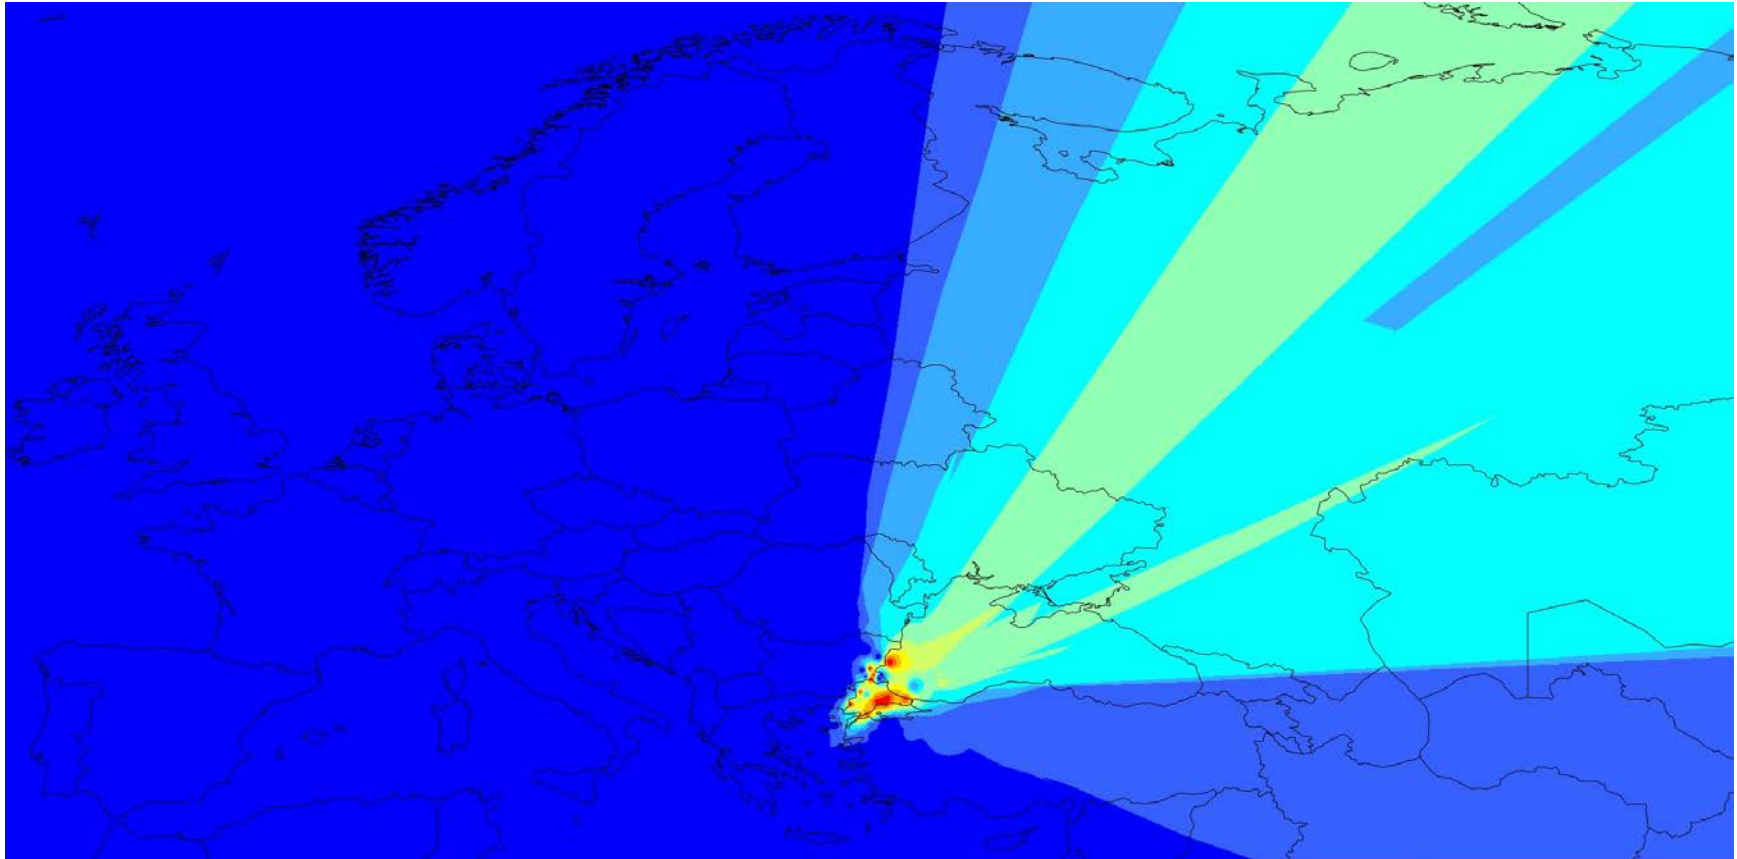

Single scale *T. karelinii* central species

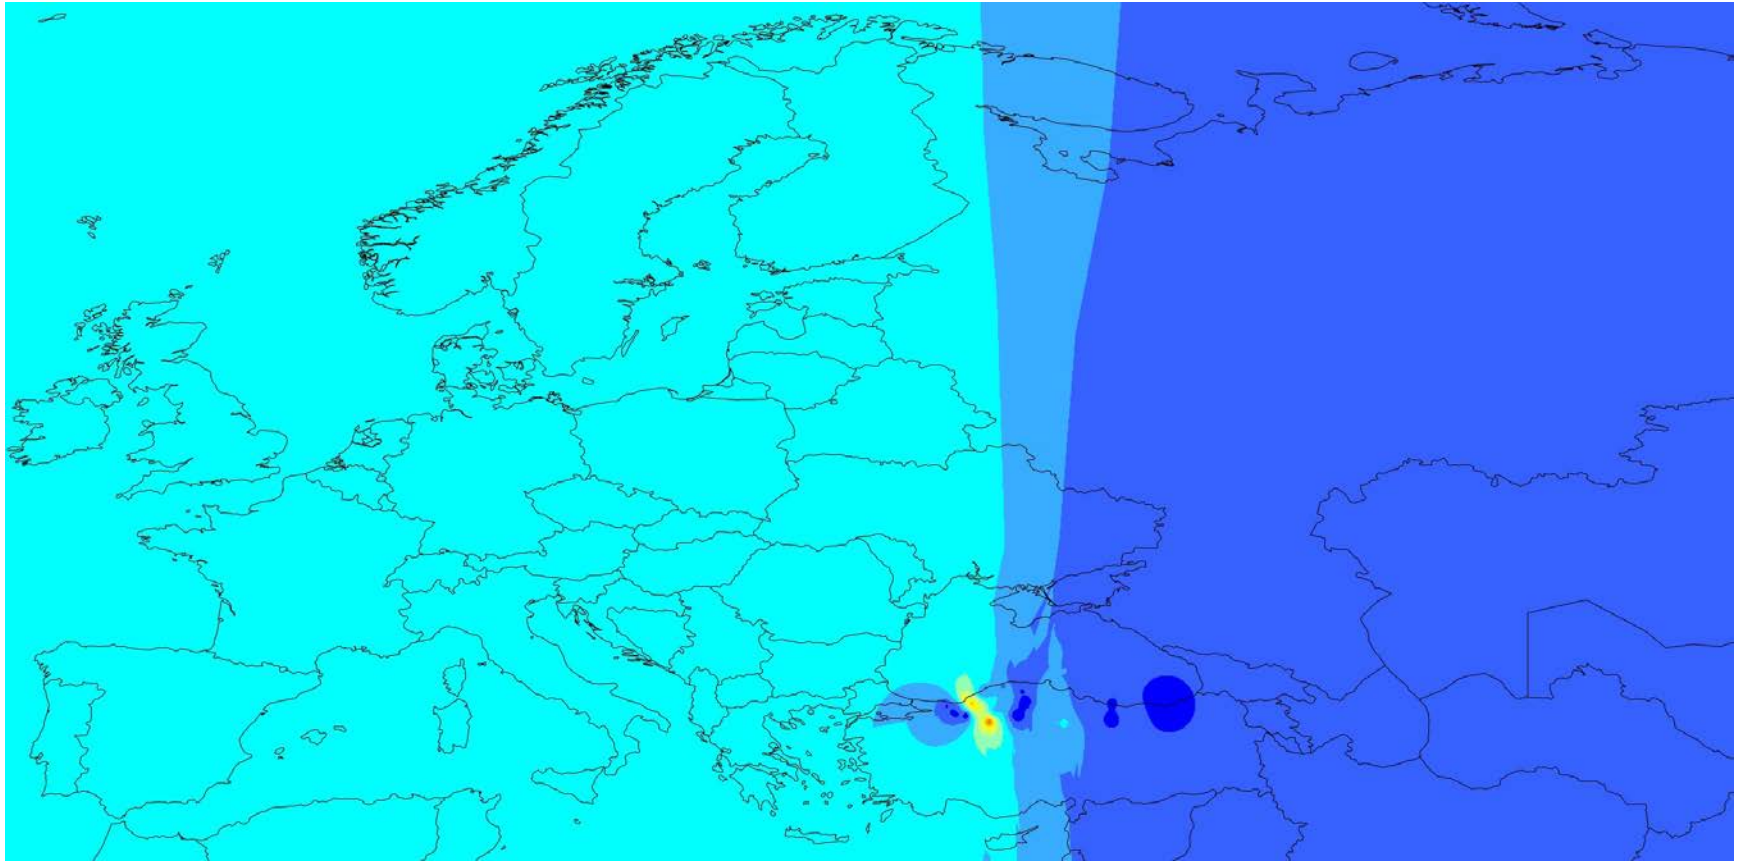

Single scale *T. karelinii* eastern species

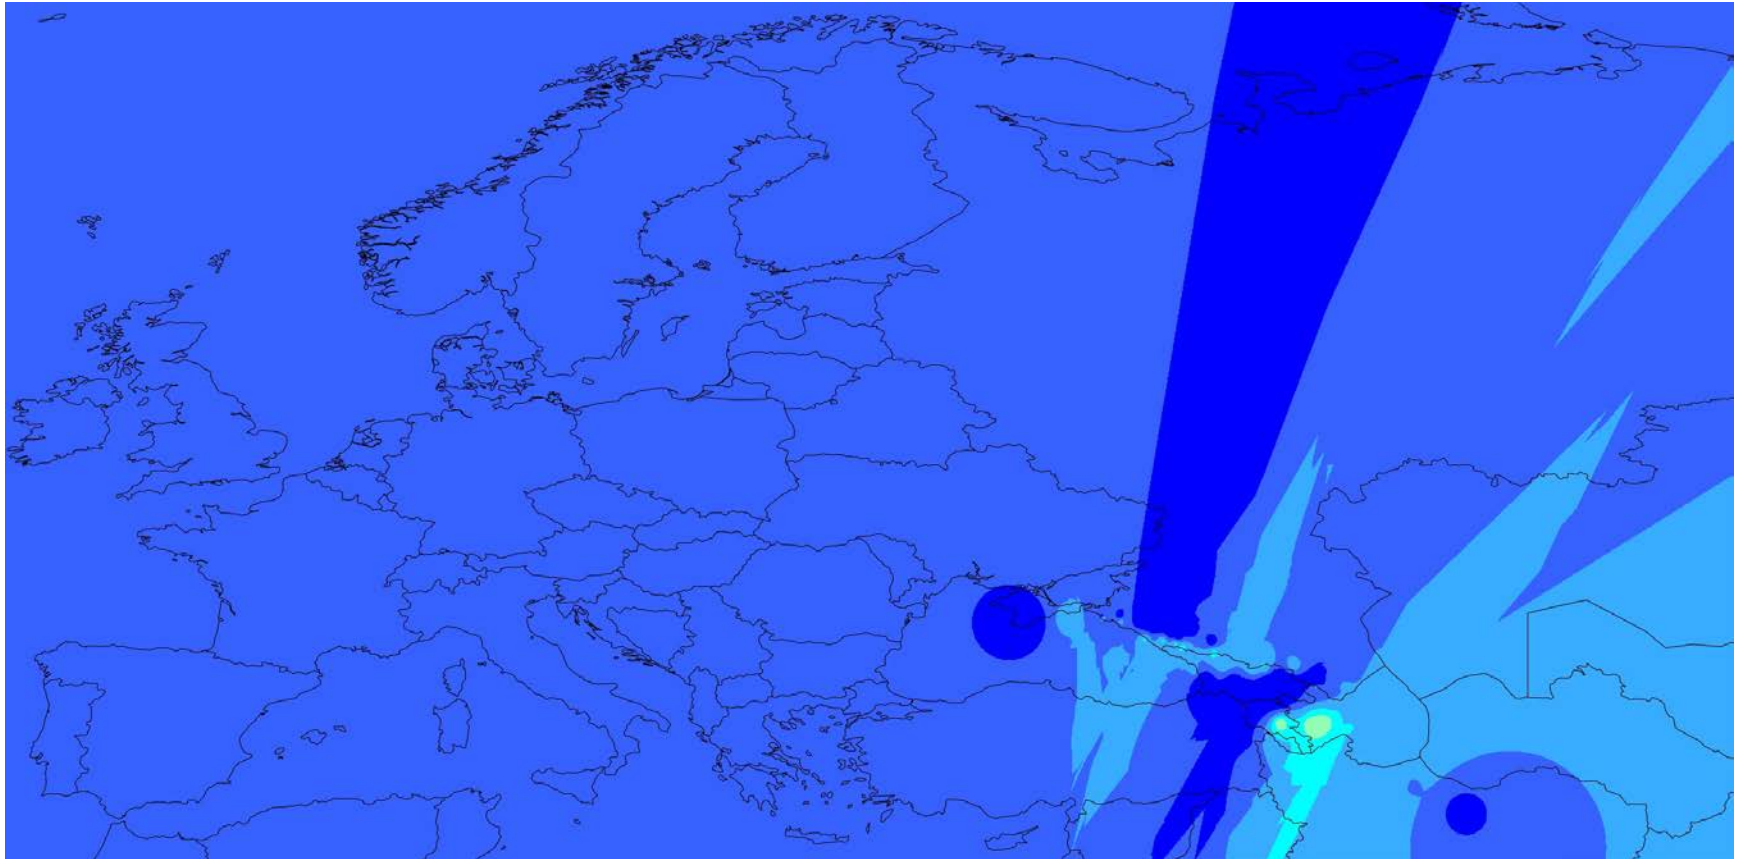

**Single scale *T. macedonicus***

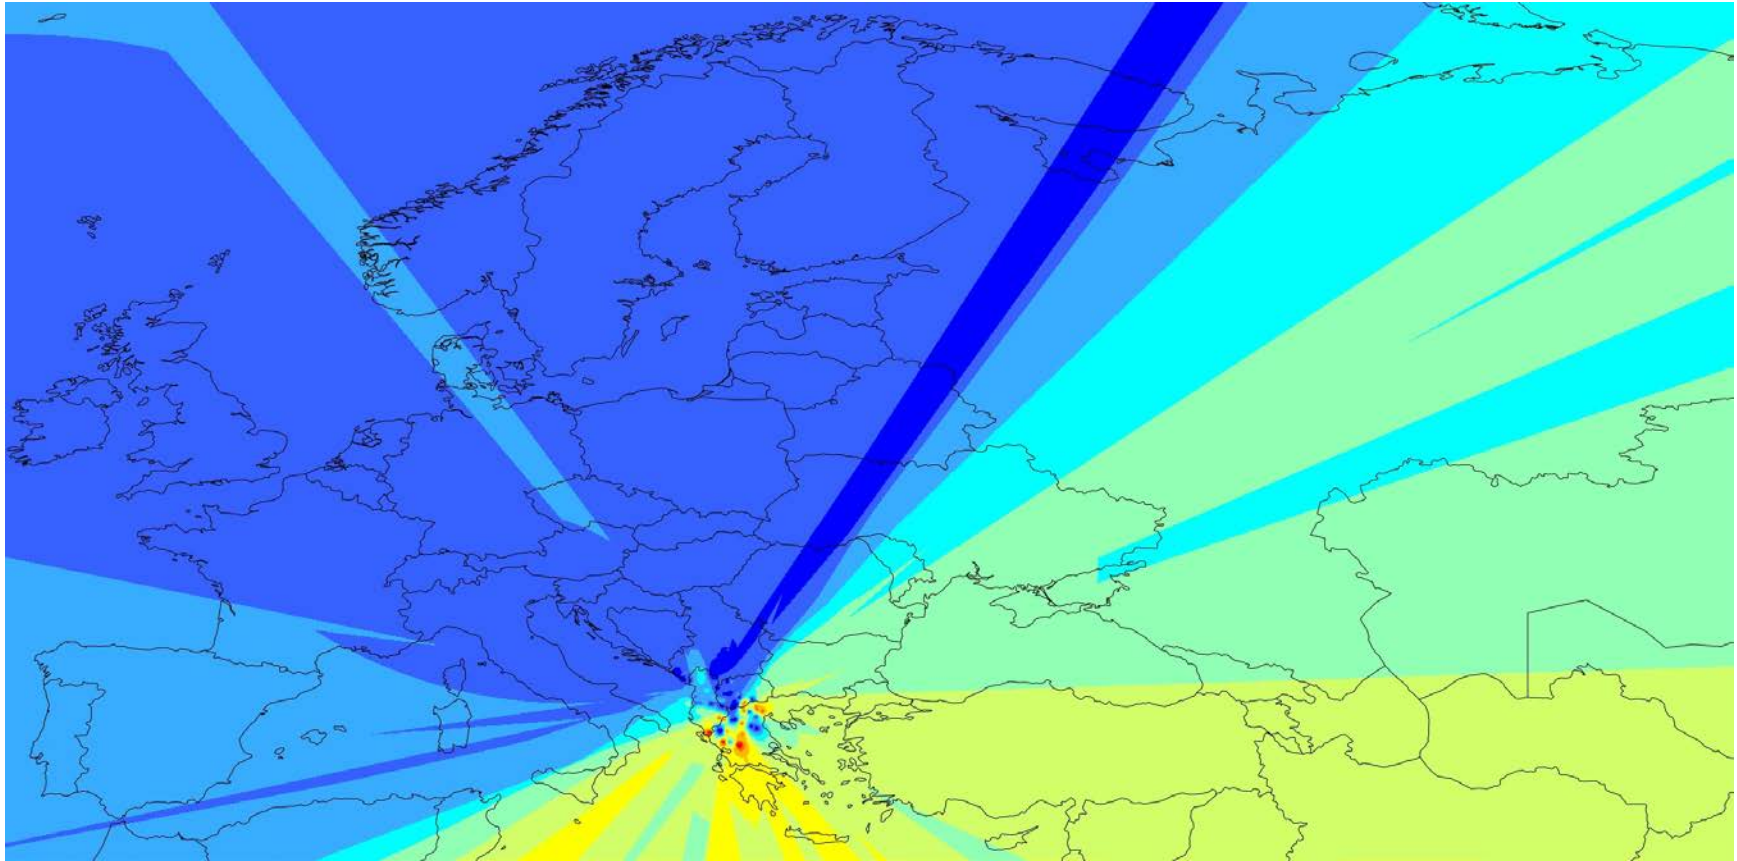

Single scale *T. marmoratus*

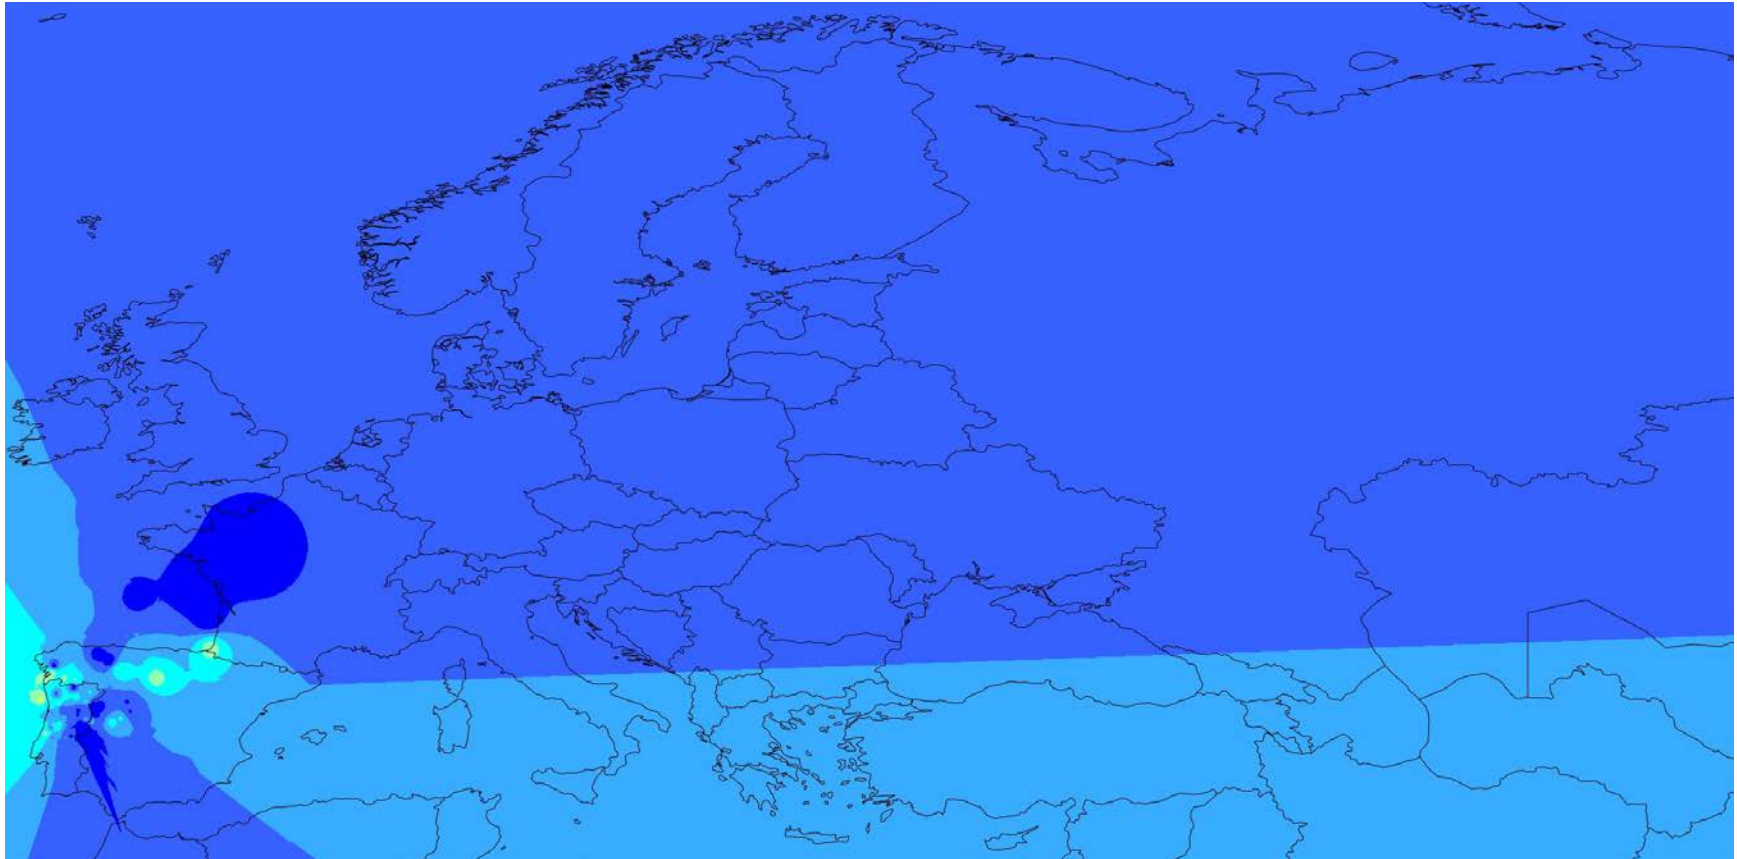



Single scale *T. pygmaeus*

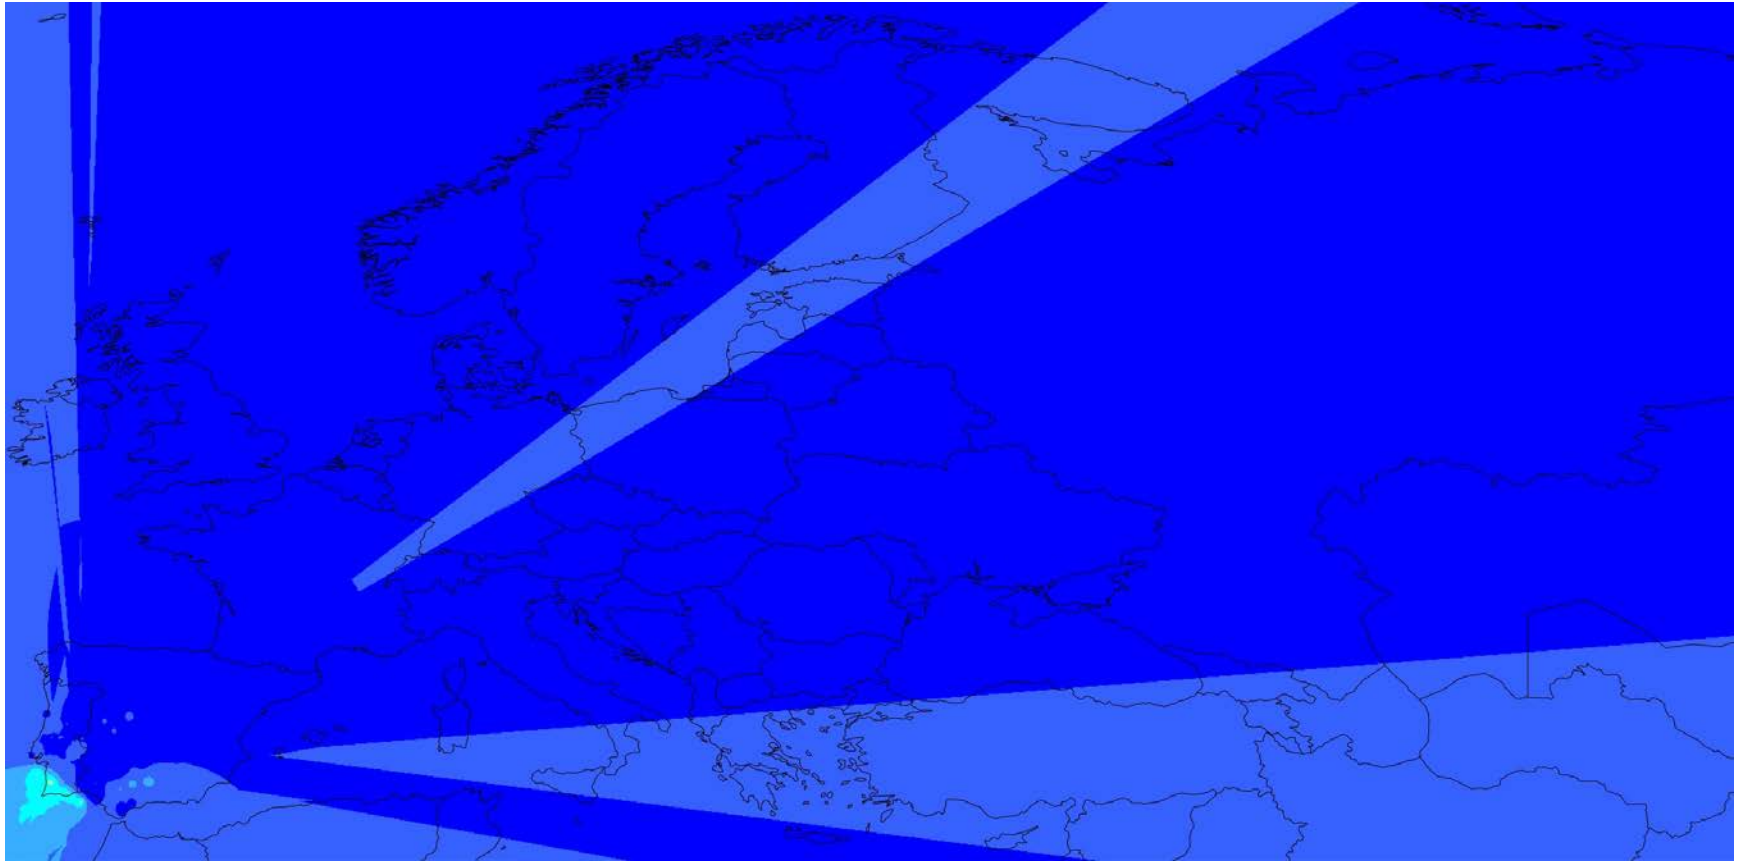

Species specific scale *T. carnifex*

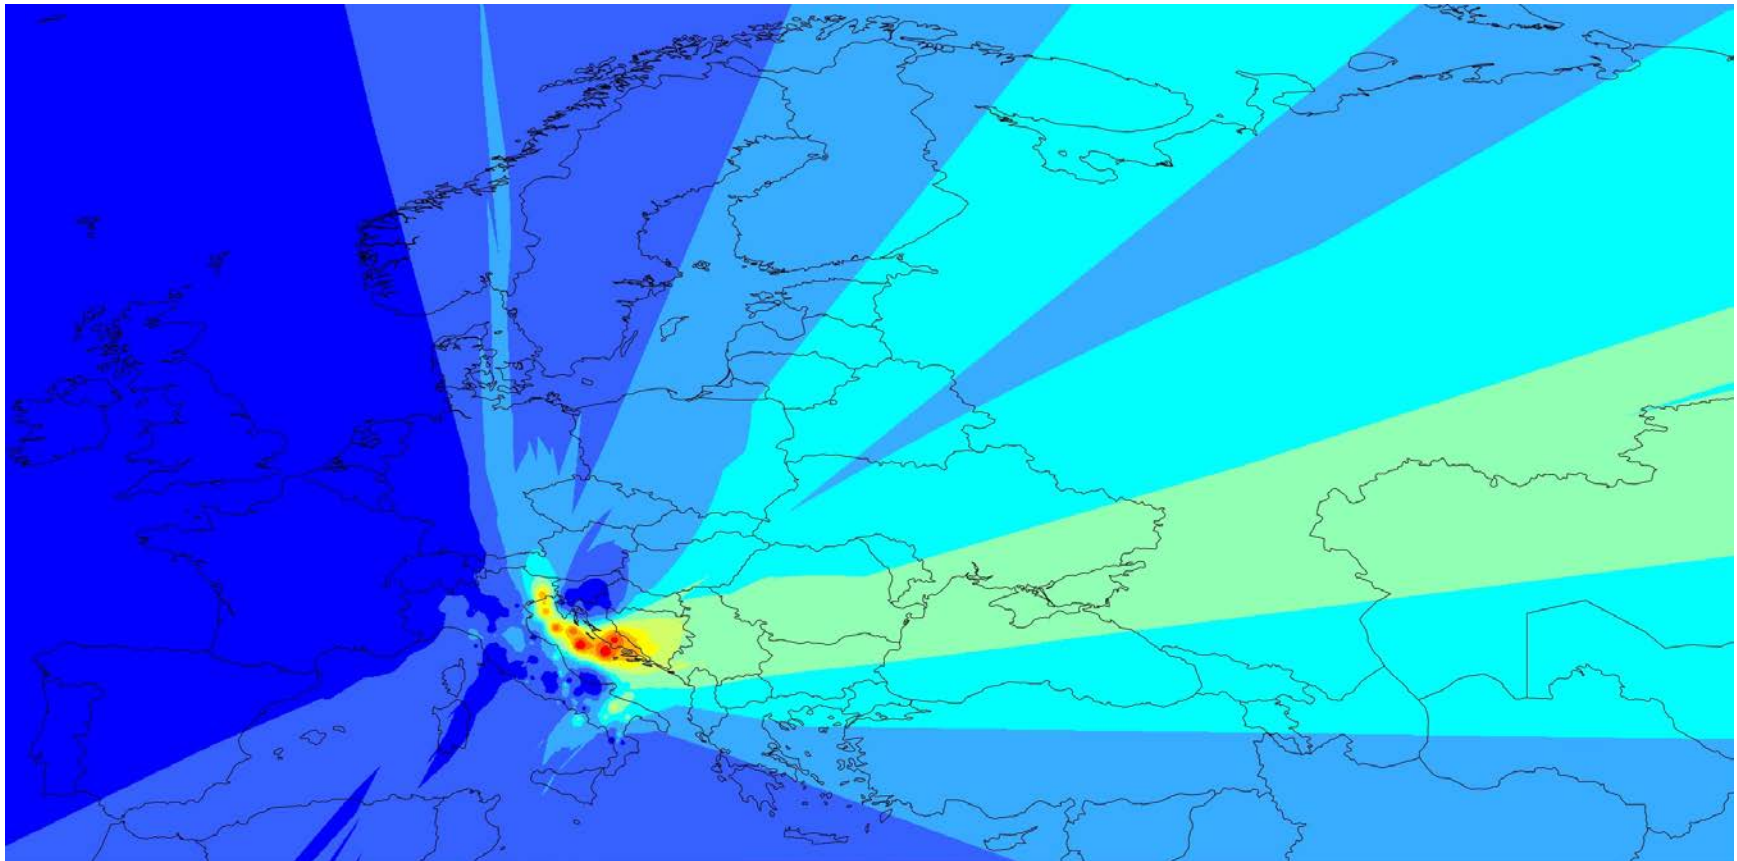

Species specific scale *T. cristatus*

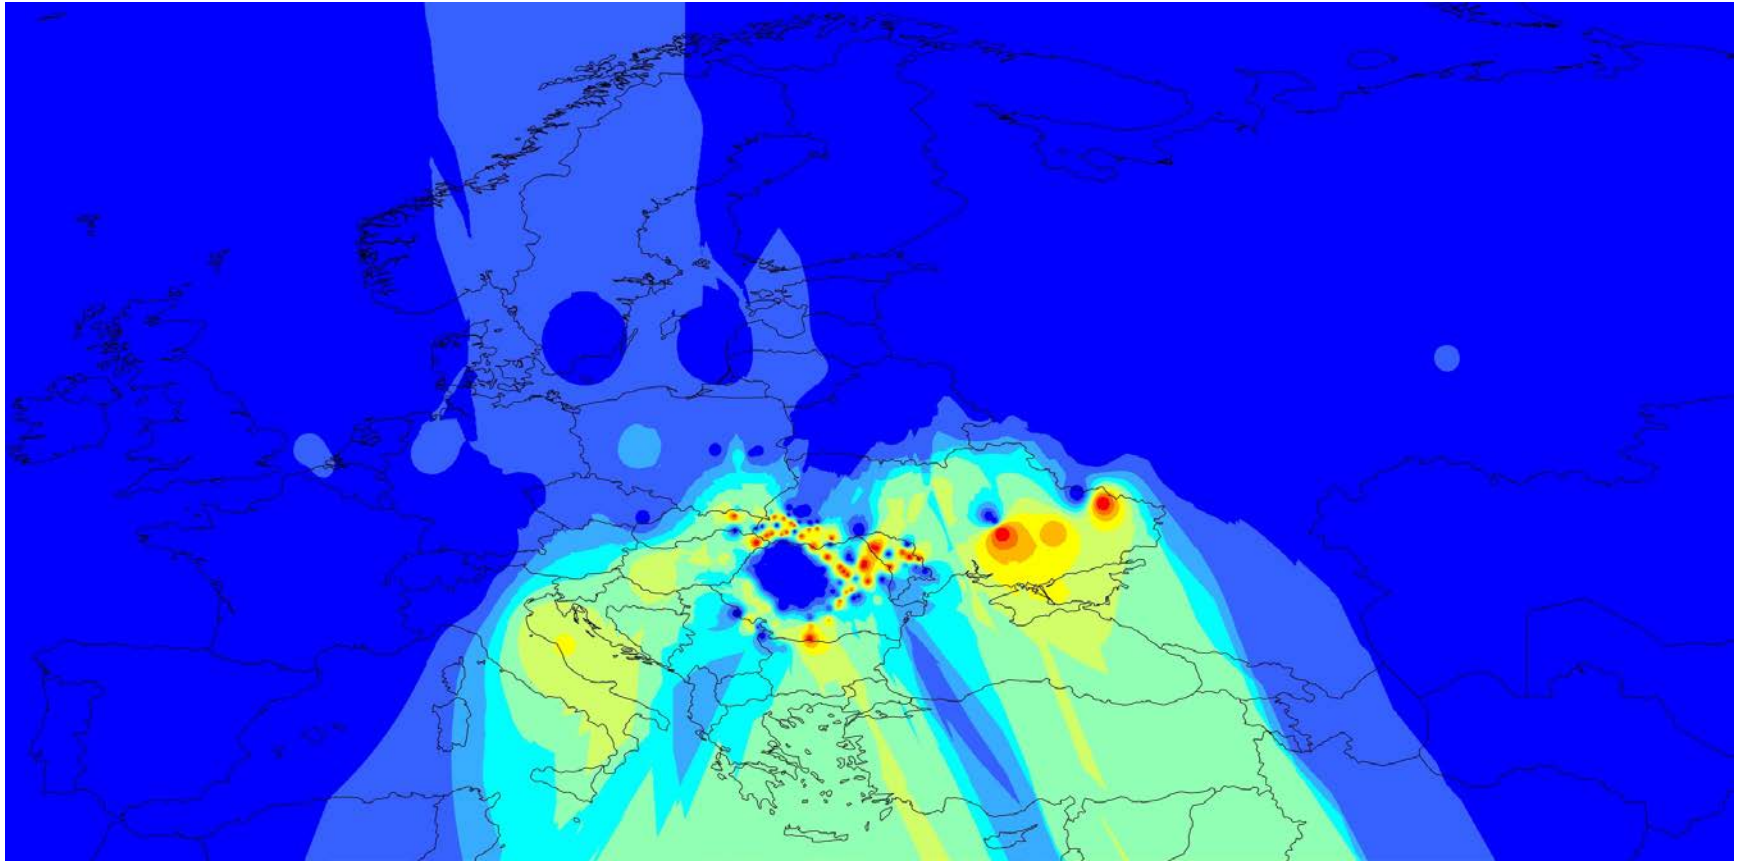

**Species specific scale *T. dobrogicus***

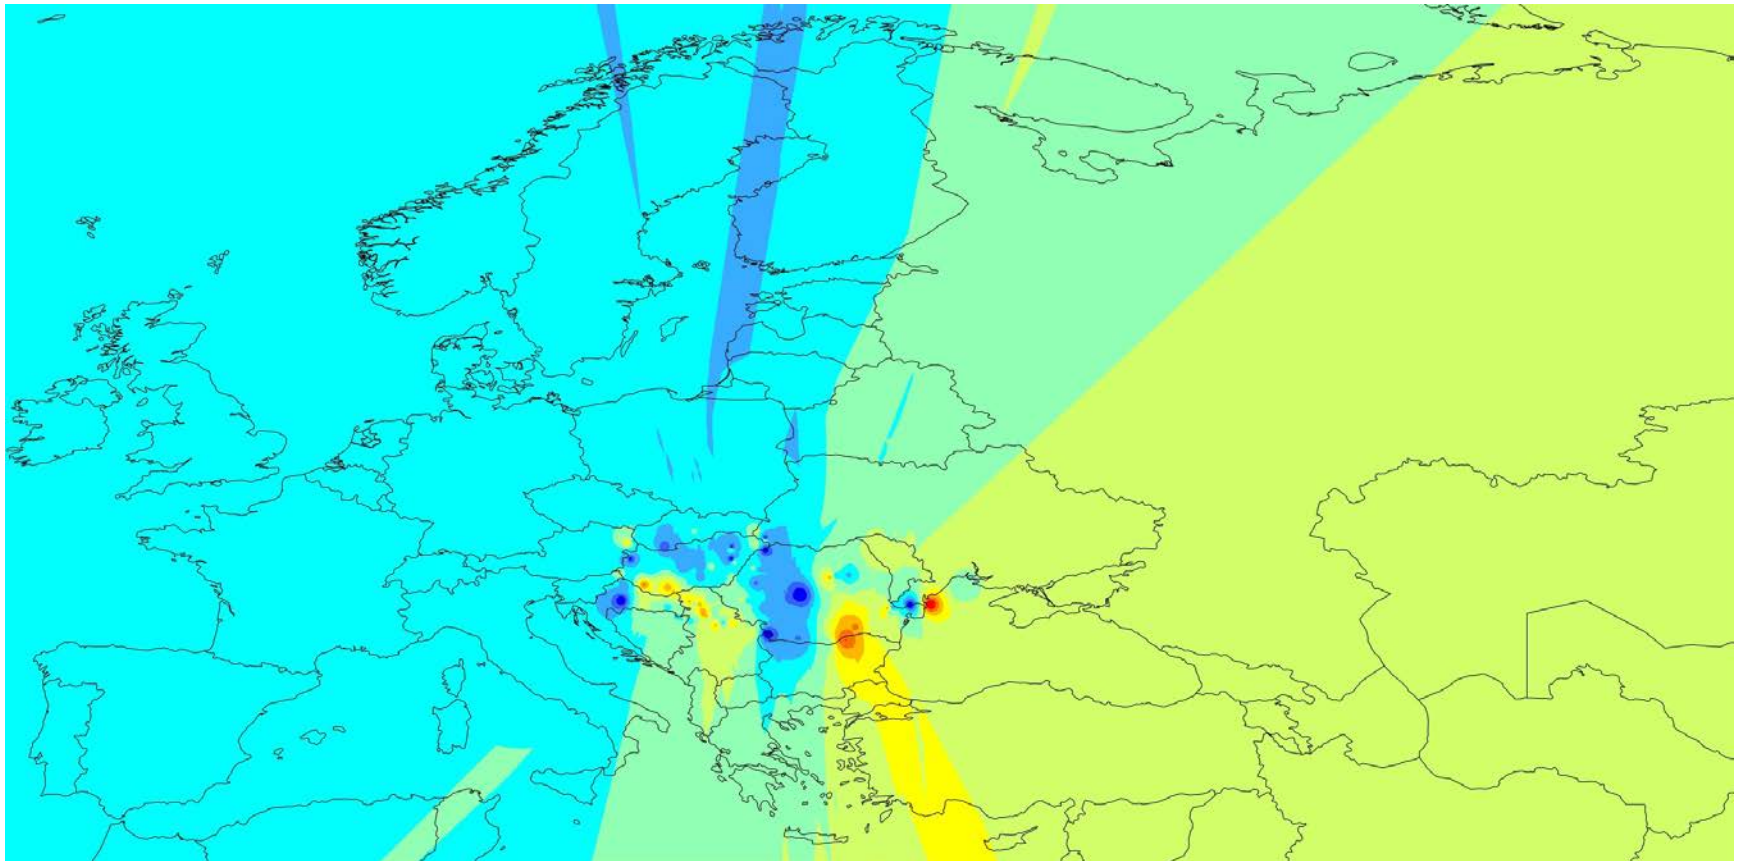

Species specific scale *T. karelinii* western species

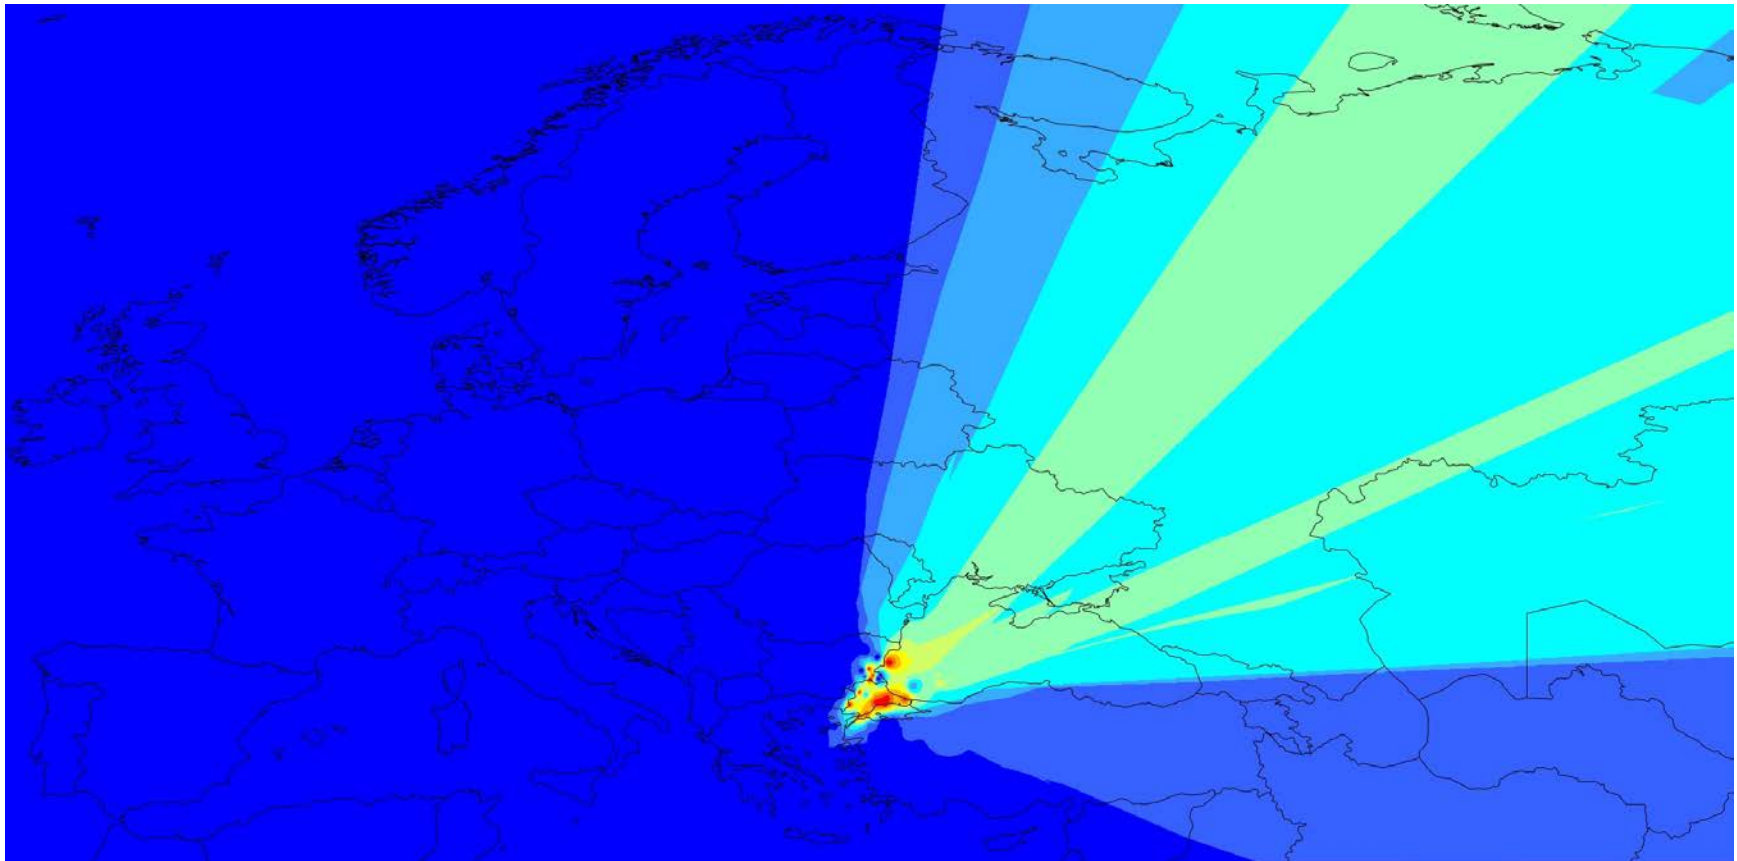

Species specific scale *T. karelinii* central species

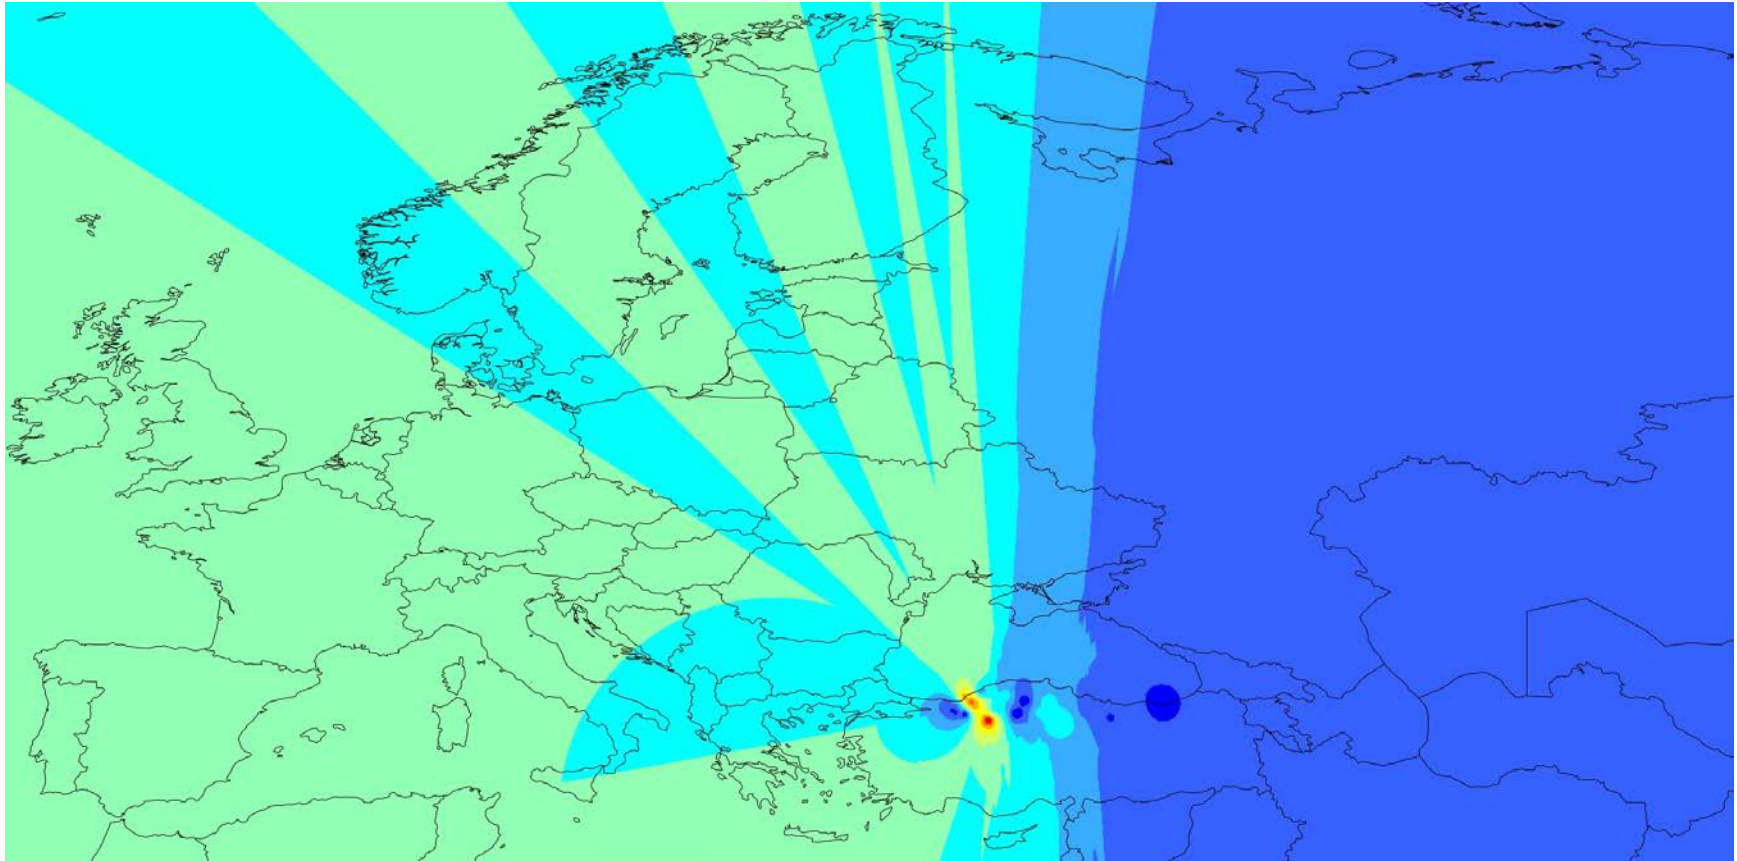



**Species specific scale *T. macedonicus***

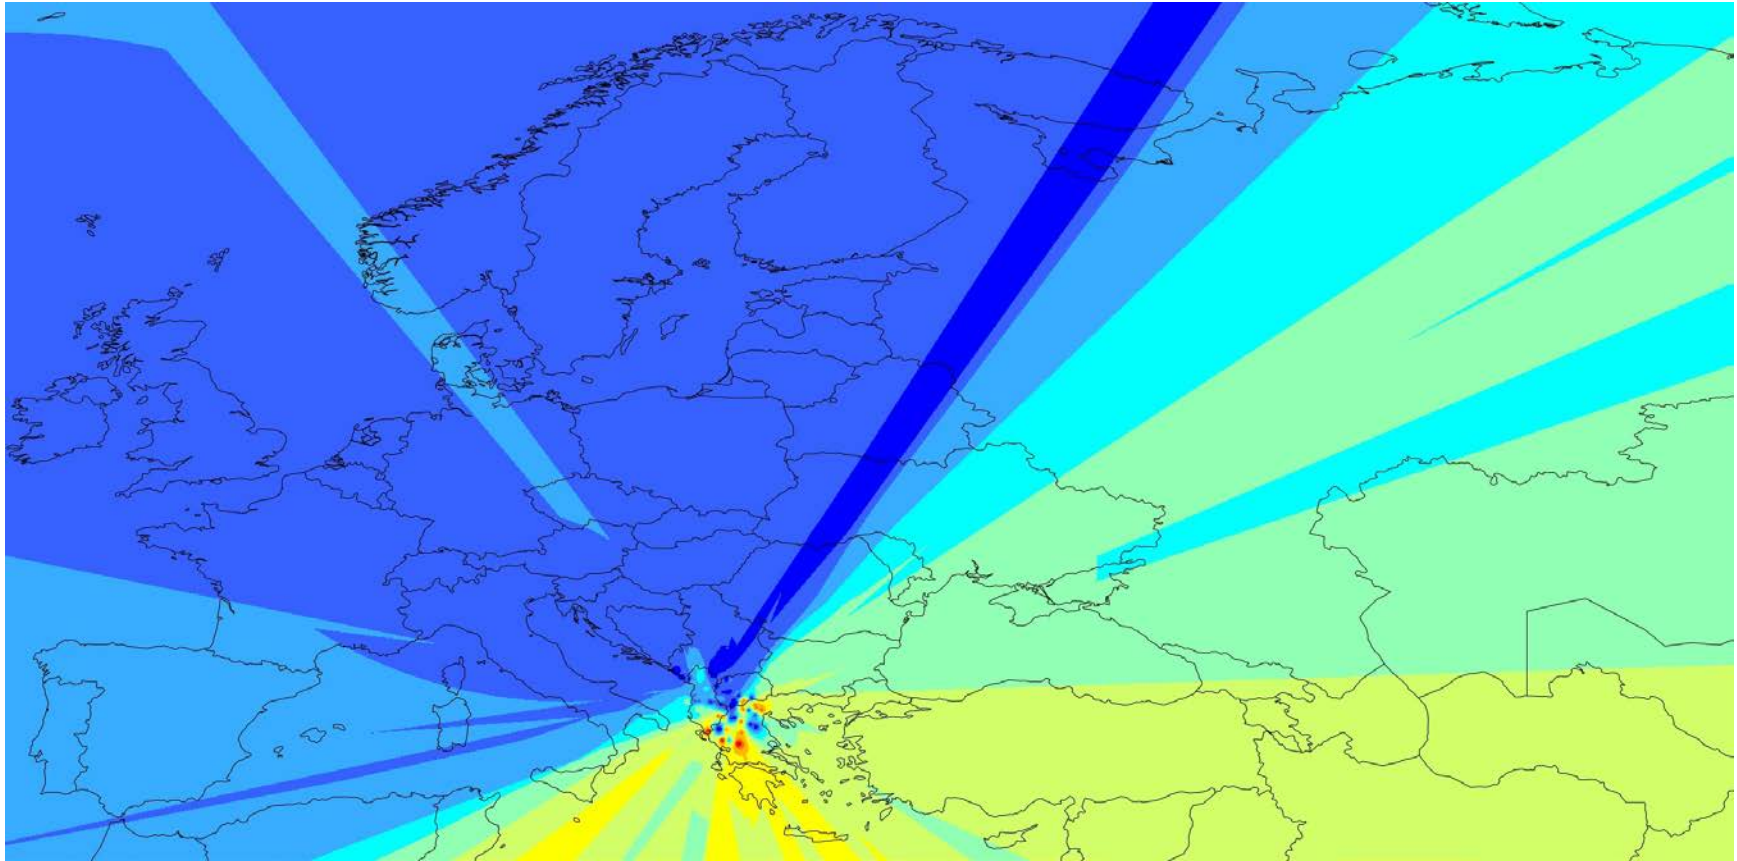



**Species specific scale *T. marmoratus***

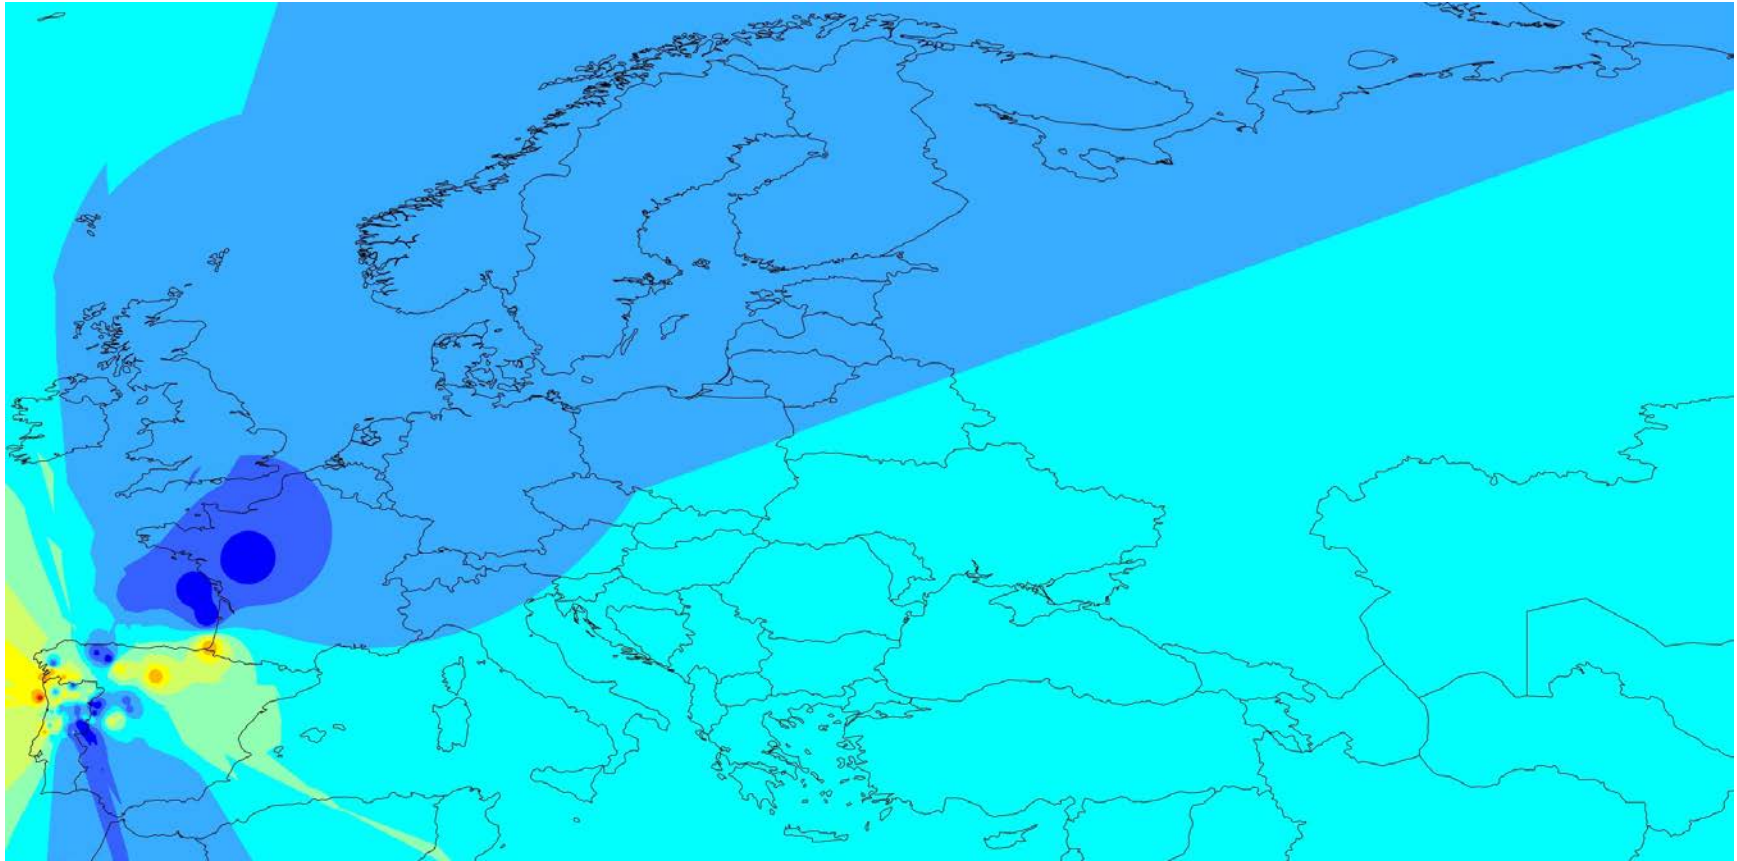

Species specific scale *T. pygmaeus*

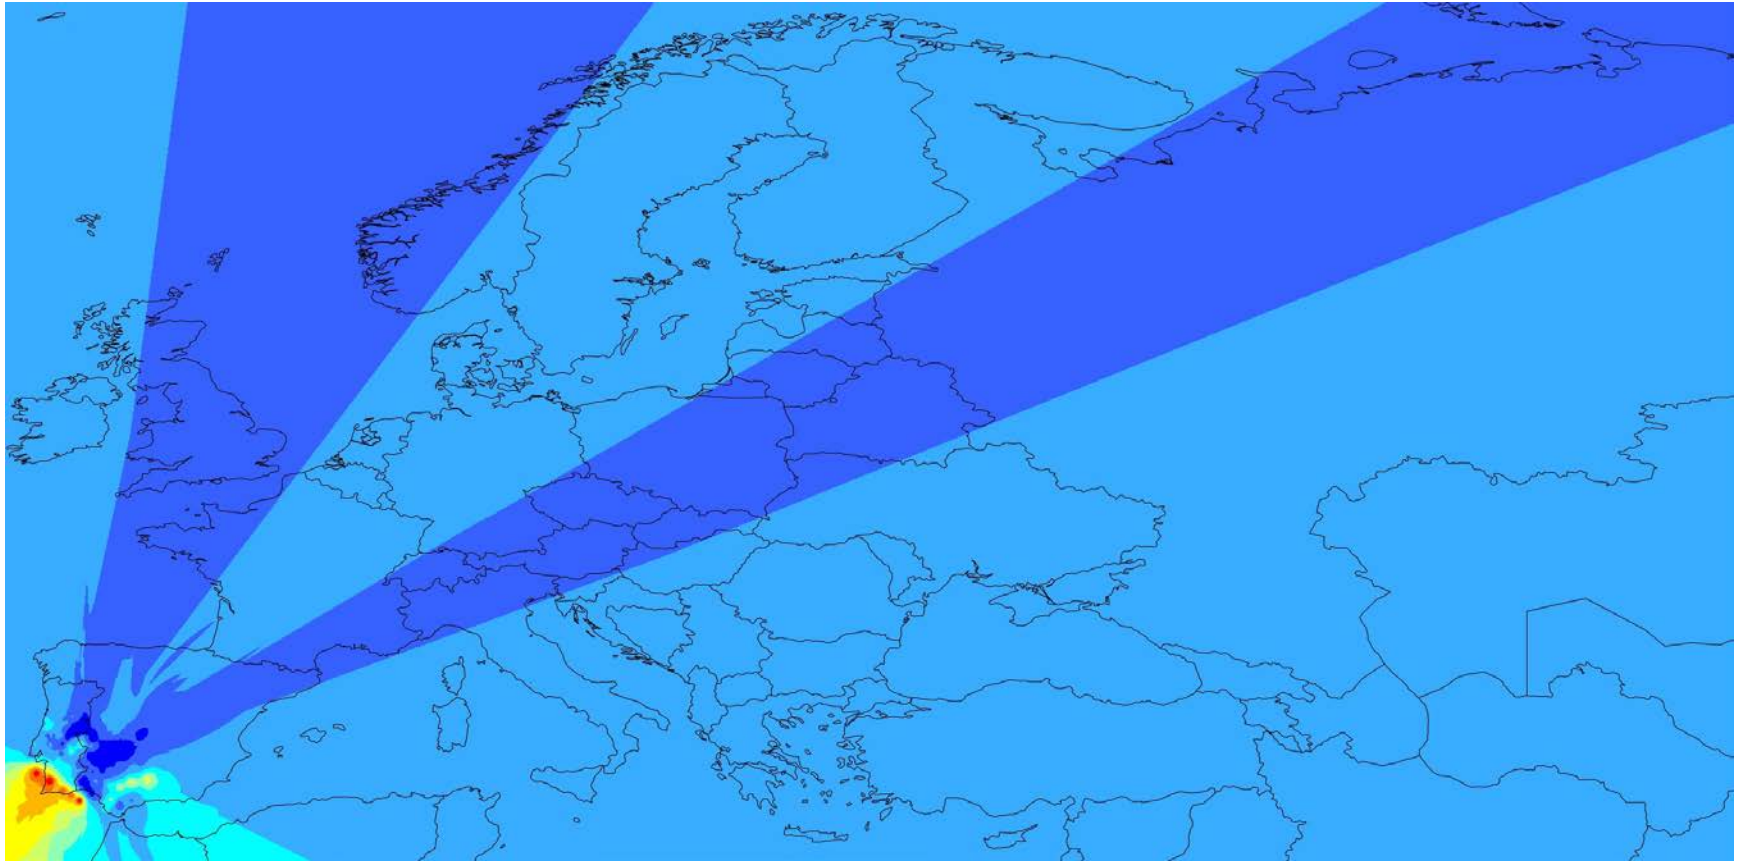

Supplement: 1742-9994-10-13-S5.pdf [file 1742-9994-10-13-S5.pdf]
